# The possible disappearance of a massive star in the low-metallicity galaxy PHL 293B

Andrew P. Allan<sup>1</sup>,<sup>1</sup>★ Jose H. Groh,<sup>1</sup> Andrea Mehner,<sup>2</sup> Nathan Smith,<sup>3</sup> Ioana Boian,<sup>1</sup> Eoin J. Farrell<sup>1</sup> and Jennifer E. Andrews<sup>3</sup>

<sup>1</sup>*School of Physics, Trinity College Dublin, The University of Dublin, College Green, Dublin-2, Ireland*

<sup>2</sup>*ESO – European Organisation for Astronomical Research in the Southern Hemisphere, Alonso de Córdova 3107, Vitacura, Santiago de Chile, Chile*

<sup>3</sup>*Steward Observatory, University of Arizona, 933 N. Cherry Ave., Tucson, AZ 85721, USA*

Accepted 2020 June 2. Received 2020 June 2; in original form 2020 March 31

## ABSTRACT

We investigate a suspected very massive star in one of the most metal-poor dwarf galaxies, PHL 293B. Excitingly, we find the sudden disappearance of the stellar signatures from our 2019 spectra, in particular the broad H lines with P Cygni profiles that have been associated with a massive luminous blue variable (LBV) star. Such features are absent from our spectra obtained in 2019 with the Echelle Spectrograph for Rocky Exoplanet- and Stable Spectroscopic Observation and X-shooter instruments of the European Southern Observatory’s Very Large Telescope. We compute radiative transfer models using CMFGEN, which fit the observed spectrum of the LBV and are consistent with ground-based and archival *Hubble Space Telescope* photometry. Our models show that during 2001–2011, the LBV had a luminosity  $L_* = 2.5\text{--}3.5 \times 10^6 L_\odot$ , a mass-loss rate  $\dot{M} = 0.005\text{--}0.020 M_\odot \text{ yr}^{-1}$ , a wind velocity of  $1000 \text{ km s}^{-1}$ , and effective and stellar temperatures of  $T_{\text{eff}} = 6000\text{--}6800$  and  $T_* = 9500\text{--}15\,000 \text{ K}$ . These stellar properties indicate an eruptive state. We consider two main hypotheses for the absence of the broad emission components from the spectra obtained since 2011. One possibility is that we are seeing the end of an LBV eruption of a surviving star, with a mild drop in luminosity, a shift to hotter effective temperatures, and some dust obscuration. Alternatively, the LBV could have collapsed to a massive black hole without the production of a bright supernova.

**Key words:** stars: late-type – stars: massive – stars: peculiar – stars: winds, outflows.

## 1 INTRODUCTION

Massive stars are among the most important sources of ionizing photons and chemical elements, producing a significant proportion of the elements currently present in the Universe. They are instrumental to the understanding of a variety of astrophysical topics, including the link between supernovae (SNe) and gamma-ray bursts to the nature of their respective progenitors (e.g. Schulze et al. 2015), as well as the early evolution of the Universe.

Our current understanding of massive stars and their fates is quite incomplete in environments with metallicity ( $Z$ ) lower than the Small Magellanic Cloud ( $Z \simeq 0.2 Z_\odot$ ; Hunter et al. 2007). This is owed mainly to a scarcity of observations of massive stars at very low  $Z$ , especially in late evolutionary stages. Wolf–Rayet (WR) stars are generally rare in very metal poor regions (Crowther & Hadfield 2006), with surveys detecting evolved WR stars in the SMC (Massey, Olsen & Parker 2003; Massey et al. 2014; Neugent, Massey & Morrell 2018; Shenar et al. 2020) and I Zw 18 galaxy

(Izotov et al. 1997; Legrand et al. 1997; Brown et al. 2002). A handful of luminous blue variables have been found in the SMC including HD5980 (Barba et al. 1995; Drissen et al. 2001) and other low-metallicity galaxies (Izotov & Thuan 2009; Izotov et al. 2011). Red supergiants are also thought to be rare at very low  $Z$  (e.g. Eldridge et al. 2017).

Efforts to advance our understanding are being made, with recent numerical stellar evolution models of low-metallicity stars revealing a surprising prediction. They indicate that some of the most massive stars may end their lives as unstable LBV stars (Groh et al. 2019b), as they fail to shed mass and become H-poor WR stars. The LBV phase is thought to occur late in the evolution of massive stars (e.g. Humphreys & Davidson 1994; Maeder & Meynet 2000; Groh et al. 2014). LBVs show re-occurring eruptive events generating considerable mass-loss (Smith & Owocki 2006), in addition to irregular photometric and spectroscopic variations of the S-Doradus type (van Genderen 2001). LBVs play a key role in the mass budget of very massive stars (Smith 2014) and regulate their final compact remnant masses, which in some cases can be a massive black hole (BH; Groh et al. 2019). LBVs are also thought to be immediate progenitors of some SN explosions (e.g. Kotak & Vink 2006;

\* E-mail: allana@tcd.ie

**Table 1.** Summary of the spectroscopic observations of PHL 293B from 2001 to 2019.

| Instrument    | Date       | Wavelength range (Å) | Setup                                              | Resolving power  |
|---------------|------------|----------------------|----------------------------------------------------|------------------|
| VLT/X-shooter | 2019-12-17 | 3000–23000           | UVB, VIS, NIR (1.0 arcsec, 0.9 arcsec, 0.9 arcsec) | 5400, 8900, 5600 |
| VLT/ESPRESSO  | 2019-08-28 | 3800–7800            | MR42 (4x1 arcsec <sup>2</sup> )                    | 72 000           |
| HST/COS       | 2018-04-30 | 1027–2337            | G140L (2.5 arcsec)                                 | 2000             |
| INT/IDS       | 2016-07-02 | 5890–7230            | H1800V (1 arcsec)                                  | 7000             |
| WHT/ISIS      | 2011-11-30 | 3805–8095            | R300B/7500 (1 arcsec)                              | 1000             |
| WHT/ISIS      | 2011-09-24 | 2630–6230            | R300B/5700 (1 arcsec)                              | 1000             |
| VLT/X-shooter | 2009-09-28 | 3000–23 000          | UVB, VIS, NIR (1.0 arcsec, 0.9 arcsec, 0.9 arcsec) | 5100, 8800, 5600 |
| VLT/X-shooter | 2009-08-16 | 3000–23 000          | UVB, VIS, NIR (1.0 arcsec, 0.9 arcsec, 0.9 arcsec) | 5100, 8800, 5600 |
| VLT/UVES      | 2002-11-08 | 3100–6800            | DICHR#1 (1 arcsec)                                 | 40 000           |
| SDSS          | 2001-02-22 | 3810–9200            | 3-arcsec fibre                                     | 2000             |

Gal-Yam & Leonard 2009; Smith et al. 2011; Groh, Meynet & Ekström 2013; Boian & Groh 2018).

In an effort to improve our understanding of very massive stars at low  $Z$ , we have monitored the blue compact dwarf (BCD) galaxy PHL 293B. This galaxy lies at a distance of 23.1 Mpc (Mould et al. 2000), and has a metallicity of  $Z \simeq 0.1 Z_{\odot}$  (Izotov, Thuan & Stasińska 2007). Spectroscopic observations of the compact galaxy obtained between 2001 and 2011 consistently featured broad, strong emission components in the hydrogen Balmer lines. These spectral features have been interpreted to originate in the LBV outflow (Izotov & Thuan 2009; Izotov et al. 2011), since together with the presence of Fe II and weak He I lines, only LBVs show these types of signatures (see the discussion in sections 2.4 and 3 of Groh et al. 2014). These earlier spectra were remarkably similar, differing mainly in the strength of the narrow components, likely due to the different aperture sizes used. Photometric analysis of PHL 293B revealed no optical photometric variability at the level of 0.1 mag between 1988 and 2013 (Terlevich et al. 2014). Based on this, Terlevich et al. (2014) suggested that the blueshifted absorptions of H I and Fe II were not caused by an LBV, but instead by an expanding supershell generated by the cluster wind of PHL 293B. The substantial spectral variation we report disfavors such a hypothesis. Burke et al. (2020) also report the weakening of the hydrogen broad components based on 2019 Gemini data. In addition, they report photometric variability of 0.12 mag in the  $g$  band between 1998 and 2018, using images from the Sloan Digital Sky Survey (SDSS) and the Dark Energy Survey (DES). They suggest an SN II<sub>n</sub> or an unusual outburst as the source of the broad components in the 2001–2011 spectra.

Here, we report new observations of PHL 293B obtained in 2019 with the European Southern Observatory’s Very Large Telescope (ESO/VLT) instruments X-shooter and Echelle Spectrograph for Rocky Exoplanet- and Stable Spectroscopic Observation (ESPRESSO). We also discuss unpublished, optical archival imaging obtained with the *Hubble Space Telescope* (HST). We compute radiative transfer models of stellar winds to interpret the spectroscopic observations and the existing photometric data. As we elaborate below, we find that the LBV was in an eruptive state at least between 2001 and 2011, which then ended, and may have been followed by a collapse into a massive BH without the production of an SN. This scenario is consistent with the available HST and ground-based photometry.

## 2 OBSERVATIONS AND MODELLING OF THE LBV

We present new spectra of PHL 293B obtained in 2019 using the ESO/VLT instruments X-shooter and ESPRESSO and compare

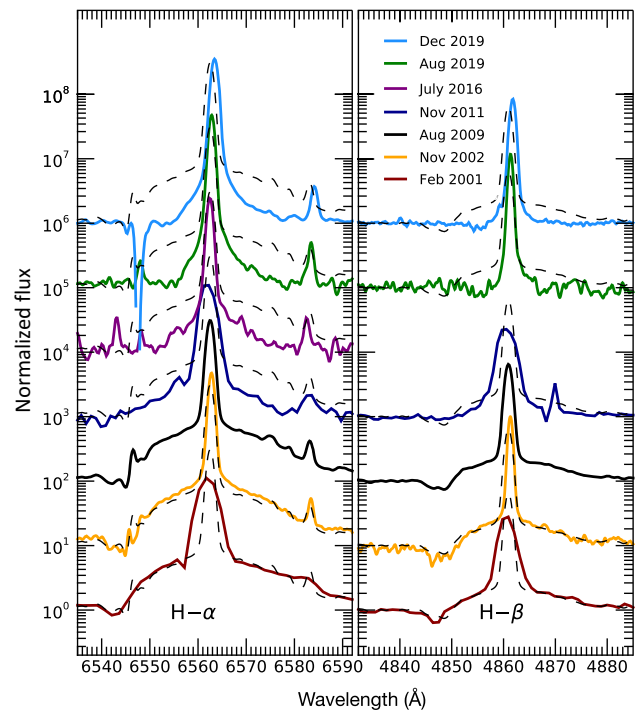

**Figure 1.** Spectroscopic evolution of PHL 293B between 2001 (lowest spectrum) and 2019 (highest spectrum). The 2009 X-shooter spectrum (dashed grey) is overplotted to all spectra, which are also shifted for clarity.

these to archival spectra obtained between 2001 and 2016 (see Table 1). ESPRESSO was used in the four-Unit Telescope mode, combining the light from four 8-m telescopes. The data were reduced with the ESO pipeline version ESPDR/1.3.0. The X-shooter data were reduced with the ESO pipeline version XSHOO/3.3.5. The archival INT/IDS, WHT/ISIS, and 2009 X-shooter spectra were obtained without flux standards and flat fields. Therefore, we re-scaled the flux as to best match the equivalent width of the narrow component of the H  $\alpha$  line of a spectrum with a similar aperture size (UVES).

Fig. 1 highlights the absence of the inferred LBV signature from the spectra of PHL 293B in 2016 to 2019. Other signatures that were interpreted as being due to the LBV, such as from Fe II and He I (Izotov & Thuan 2009; Izotov et al. 2011), are also not detected in our 2019 data. We interpret the lack of spectral variability in the 2001, 2002, 2009, and 2011 spectra (also noted by Terlevich et al. 2014) as confirmation of the LBV’s presence, with the inferred LBV signatures disappearing sometime between 2011 and 2016.

**Table 2.** CMFGEN atomic model used in the analysis of PHL 293B.

| Species | No. of super levels | No. of atomic levels |
|---------|---------------------|----------------------|
| H I     | 20                  | 30                   |
| He I    | 40                  | 45                   |
| He II   | 22                  | 30                   |
| C I     | 38                  | 80                   |
| C II    | 39                  | 88                   |
| C III   | 32                  | 59                   |
| N I     | 44                  | 104                  |
| N II    | 157                 | 442                  |
| N III   | 42                  | 158                  |
| O I     | 69                  | 161                  |
| O II    | 26                  | 80                   |
| O III   | 33                  | 92                   |
| Na I    | 18                  | 44                   |
| Mg I    | 37                  | 57                   |
| Mg II   | 18                  | 45                   |
| Al II   | 38                  | 58                   |
| Al III  | 17                  | 45                   |
| Si II   | 22                  | 43                   |
| Si III  | 20                  | 34                   |
| Si IV   | 22                  | 33                   |
| Ca I    | 23                  | 39                   |
| Ca II   | 17                  | 46                   |
| Ti II   | 33                  | 314                  |
| Ti III  | 33                  | 380                  |
| Fe I    | 69                  | 214                  |
| Fe II   | 67                  | 403                  |
| Fe III  | 48                  | 346                  |
| Ni II   | 29                  | 204                  |
| Ni III  | 28                  | 220                  |

We also obtained archival *HST* imaging of the PHL 293B galaxy, which was observed on 2010 October 31 with *HST*/WFC3 with filters *F336W*, *F438W*, *F606W*, and *F814W* (GO-12018; PI Prestwich). We performed photometry of the brightest region of the galaxy, where the LBV is thought to reside since this is where previous spectroscopic observations centred their slit on. We use DOLPHOT (Dolphin 2000, 2016) on the standard STSCI pipeline pre-processed, charge-transfer efficiency-corrected images. These observations were obtained before the inferred LBV signature within the spectra disappeared, and obtain  $m_{F336W, \text{pre}} = 19.70 \pm 0.01$ ,  $m_{F438W, \text{pre}} = 20.82 \pm 0.01$ ,  $m_{F606W, \text{pre}} = 20.31 \pm 0.01$ , and  $m_{F814W, \text{pre}} = 20.03 \pm 0.01$  mag in the *F336W*, *F438W*, *F606W*, and *F814W* filters, respectively.

To constrain the parameters of the LBV in PHL 293B during outburst, we compute new radiative transfer models and fit the high-resolution 2002 UVES spectrum. We use the line-blanketed atmospheric/wind radiative transfer code CMFGEN (Hillier & Miller 1998) to compute continuum and line formation in non-local thermodynamic equilibrium (NLTE) and spherical symmetry. Our new models use similar physical assumptions to those of the LBV progenitor of the SN candidate SN 2015bh (Boian & Groh 2018). CMFGEN takes as input the stellar luminosity  $L_*$ , stellar radius  $R_*$ , mass-loss rate  $\dot{M}$ , wind terminal speed  $v_\infty$ , and the abundances of the included species. Table 2 shows the atomic model used in this paper, which makes use of ‘super’ levels to reduce the number of levels whose atomic populations must be solved for (Anderson 1989; Hillier & Miller 1998). We assume an Fe mass fraction of  $1.7 \times 10^{-4}$ , i.e.  $\sim 0.1$  of the solar value, as expected for PHL 293B. We also assume a He mass fraction of 0.5 ( $\sim 1.8$  of the solar value),

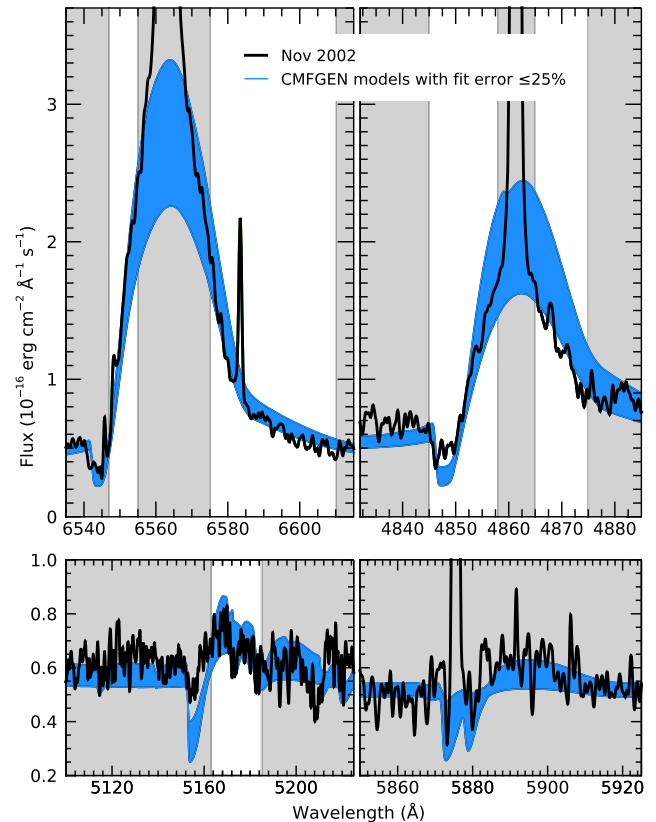

**Figure 2.** Comparison of the 2002 UVES spectrum of PHL 293B (black) to our best-fitting CMFGEN models. Blue region corresponds to models with a fit error  $\leq 25$  per cent. White regions show the wavelength ranges considered in the fit. The upper left- and right-hand panels display the  $H\alpha$  and  $H\beta$  emission lines, respectively. The lower left-hand panel includes the tested Fe II 5169-Å emission line in addition to weaker Fe II 5159- and N I 5198-Å emission and Fe III 5156-Å absorption. Some best-fitting models also feature weak Mg I 5173 and 5184 Å and Ti II 5186 and 5189 Å. The lower right-hand panel includes the He I 5786-Å line as well as Na I 5890- and 5896-Å emission.

which is typical of LBVs (e.g. Groh et al. 2009). Since only a handful of diagnostic lines are present, both the He and Fe abundances are assumed rather than derived values. In this temperature regime, the He and Fe lines are affected by a small change in stellar and/or wind parameters (Boian & Groh 2018). This is especially relevant for Fe, since we assume a solar-scaled Fe/O ratio, and this may not hold depending on the chemical evolution history of the galaxy. Since the derived metallicity of PHL 293B is based on nebular O lines (Izotov & Thuan 2009), for instance, a change in Fe abundance by a factor of 2 would be still consistent with our models.

For simplicity, our models are unclumped, and indeed they match the strength of the observed electron-scattering wings of the H lines, which are a key clumping diagnostic (Hillier 1991). We degraded the CMFGEN high-resolution synthetic spectra by convolving with a Gaussian function to match the UVES spectral resolution. Because of the high wind density, we compute both a flux temperature  $T_*$  at high optical depths (at Rosseland optical depth  $\tau_{\text{Ross}} = 10$ ), as well  $T_{\text{eff}}$  at the photosphere (where  $\tau_{\text{Ross}} = 2/3$ ).

Due to its distance of 23.1 Mpc, the LBV is spatially unresolved from the underlying stellar population of PHL 293B in seeing-limited ground-based data. Therefore, we created a grid of models with varying contribution from the LBV and (flat) background

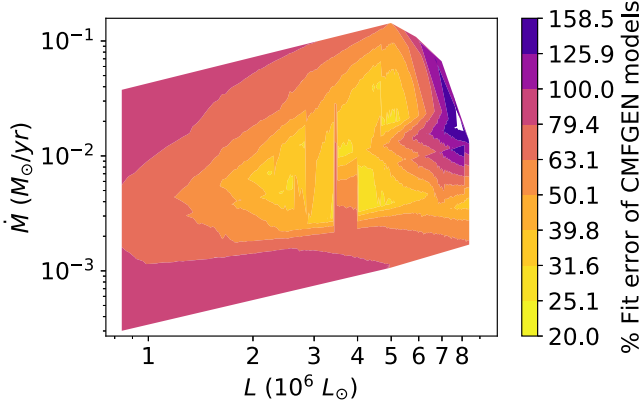

**Figure 3.** Grid of best-fitting CMFGEN models of varying stellar mass-loss rates and luminosities. The colour denotes the fit error of the models.

galaxy to the total flux. To determine the best-fitting parameters, we match simultaneously the continuum and H $\alpha$ , H $\beta$ , and Fe II 5169-Å lines. We also ensure that He I 5876 Å matches the observed level (Fig. 2). A simultaneous match is needed because all the diagnostics above depend on multiple model parameters, such as the luminosity, mass-loss rate, and effective temperature. We describe below our method to simultaneously determine the stellar and wind parameters of massive stars with cool, dense winds.

For fitting the absolute level of the continuum, we use a conservative criterion and compare the mean absolute flux of our models in the region 6470–6520 Å to the observations, and only retain models that are within  $\pm 5$  per cent of the observed value.

We then compare the equivalent width of the H $\alpha$ , H $\beta$ , and Fe II 5169-Å emission lines to the 2002 spectrum, giving equal weights to each line when computing the fit error. We chose these lines as they are the only ones where the broad component is visible with enough signal-to-noise ratio. The white regions in Fig. 2 show the wavelength range considered in this calculation for the H $\alpha$ , H $\beta$  (upper panels), and Fe II 5169-Å lines (lower left-hand panel). We neglect the narrow component of the Balmer lines as this is strongly affected by the background galaxy. We define our best-fitting models as those which produce a fit error of <25 per cent. These models produce a good fit to the observations, producing similar P Cygni emission and absorption components (Fig. 2). Fig. 3 shows the luminosity and mass-loss rate of our CMFGEN models, with the colour indicating the percentage error for the fit. Based on the best-fitting models, we estimate that the LBV contributes to 20–47 per cent of the total flux collected in the 1-arcsec aperture used in the ground-based spectroscopic observations, with the rest coming from the underlying stellar population. Note that the contribution of the LBV to the total flux would be much smaller for larger apertures, e.g. those used in the ground-based photometry of Burke et al. (2020).

Our best-fitting CMFGEN models indicate that before its disappearance, the LBV had  $L_* = (2.5\text{--}3.5) \times 10^6 L_\odot$ ,  $\dot{M} = 0.005\text{--}0.020 M_\odot \text{ yr}^{-1}$ , an effective temperature  $T_{\text{eff}} = 6000\text{--}6800 \text{ K}$ , and  $T_* = 9500\text{--}15\,000 \text{ K}$ . While models with  $L_* = (3.5\text{--}5.0) \times 10^6 L_\odot$  are consistent with the ground-based data (Fig. 3), they are too bright compared to the *HST* observations, as will be discussed. A stellar wind velocity of  $1000 \text{ km s}^{-1}$  is required by our models to reproduce the broad emission and P-Cygni absorption component of the hydrogen and iron lines. This velocity is much faster than the  $40 \text{ km s}^{-1}$  outflow observed for the extreme red supergiant (RSG) VY CMa (Smith, Hinkle & Ryde 2009) or the

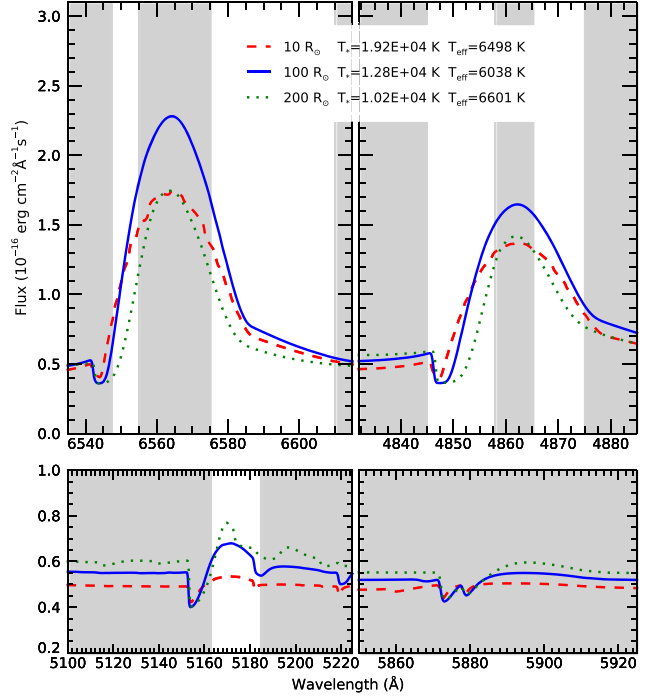

**Figure 4.** CMFGEN radiative transfer models for different stellar radii. The solid blue spectrum belongs to one of our best-fitting models with the following parameters;  $R_* = 100 R_\odot$ ,  $L_* = 2.52 \times 10^6 L_\odot$ , and  $\dot{M} = 0.008 M_\odot \text{ yr}^{-1}$ . We compare this to two otherwise identical models but with  $R_* = 10$  (dashed red line) and  $200 R_\odot$  (dotted green line).

typical velocities of  $50\text{--}300 \text{ km s}^{-1}$  observed in S Doradus outbursts of LBVs (van Genderen 2001). The stellar and wind parameters strongly suggest that the LBV was in an eruptive state.

As the outflow of the LBV is very dense, its hydrostatic radius  $R_*$  is difficult to constrain. Fig. 4 shows that over a large range of radii, the spectral morphology shows little variation. This is similar to what has been found for Eta Car, which also possesses a high-density wind (Hillier et al. 2001, 2006; Groh et al. 2012). Hillier et al. (2001) find that the dense wind of Eta Car prevents the temperature of the underlying star from being well determined. Minor variations in line strength due to largely differing choices of the hydrostatic radius and, consequently, temperature could instead be caused by a relatively small change (30–50 per cent) in the mass-loss rate or luminosity. A different He fraction could also alter emission-line strengths in this manner. In the case of PHL 293B, large changes from our reference value of  $100 R_\odot$  would require greater mass-loss rates to fit the observations, as shown by Fig. 4. In this sense, our quoted values of  $\dot{M}$  are lower limits. We also omit the narrow region of the Balmer lines in our analysis due to its galactic origin in the observations. This further softens the importance of the chosen radius as the majority of variation resulting from changing the radius is within this component. In summary, our conclusion that the LBV possessed an extremely dense wind is not affected by the choice of  $R_*$ .

To investigate the photometric changes that would be expected in the scenario of a disappearing star, we compute synthetic photometry of our best-fitting CMFGEN LBV models in the SDSS and *HST* filters. We find that our LBV models have apparent magnitudes of  $m_{\text{LBV},g} = 20.20\text{--}21.05$  and  $m_{\text{LBV},r} = 19.79\text{--}20.56$  mag in the SDSS *g* and *r* filters, respectively. In the *HST* F336W, F438W, F606W, and F814W filters, we obtain  $m_{\text{LBV},F336W} = 19.52\text{--}20.20$ ,

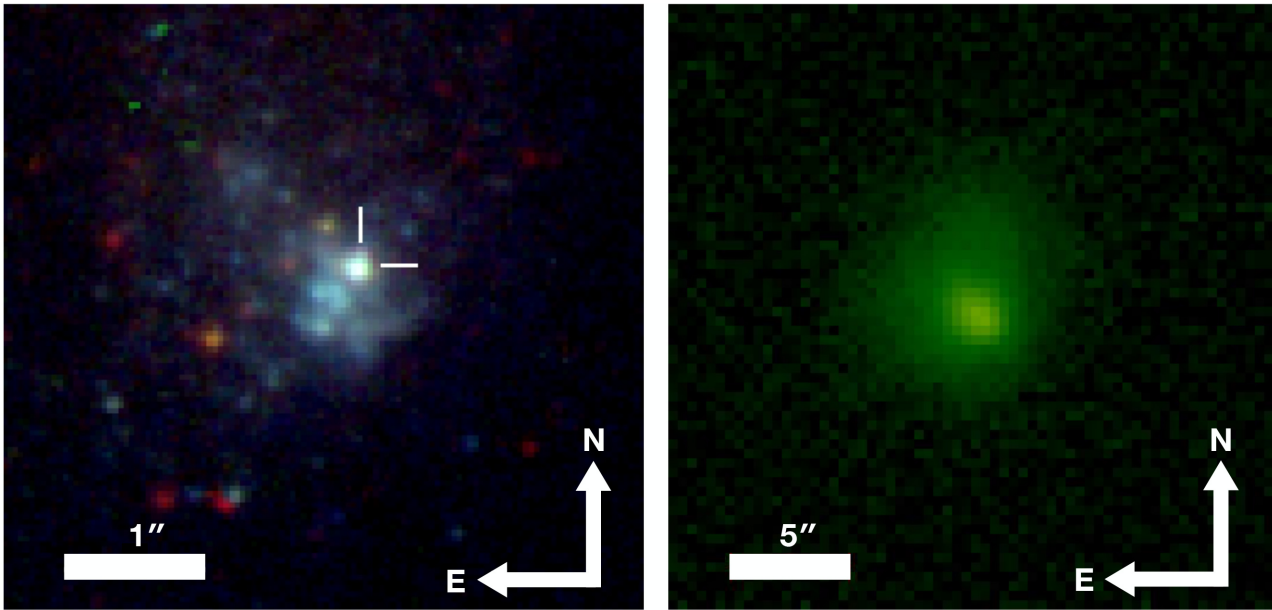

**Figure 5.** Left-hand panel: high-spatial-resolution colour-composite image of PHL obtained with *HST* WFC3 on 2010 October 31 (GO-12018; PI Prestwich). Right-hand panel: SDSS *g*-band image of PHL 293B taken on 2003 October 24. The spatial scales are indicated by the horizontal bar.

$$m_{\text{LBV}, F438W} = 20.27\text{--}21.13, \quad m_{\text{LBV}, F606W} = 19.92\text{--}20.72, \quad \text{and} \\ m_{\text{LBV}, F814W} = 19.79\text{--}20.72 \text{ mag, respectively.}$$

We determine the following relation for the expected change in apparent magnitude taken pre- and post-LBV disappearance:

$$\Delta m = m_{\text{post}} - m_{\text{pre}} = -2.5 \log(1 - 10^{(m_{\text{pre}} - m_{\text{LBV}})/2.5}), \quad (1)$$

where  $m_{\text{pre}}$  and  $m_{\text{post}}$  are the apparent magnitudes of the galaxy in a given filter before and after the LBV disappeared, respectively, and  $m_{\text{LBV}}$  is the apparent magnitude of the LBV.

We use the photometry from Burke et al. (2020) to estimate  $m_{\text{pre}}$  for both the SDSS *g* and *r* bands. We interpolate the SDSS 2005 and 2013 observations and find  $m_{\text{pre}, g} \simeq m_{\text{pre}, r} \simeq 17.83$  mag. Using equation (1), we obtain  $\Delta m$  of about 0.06–0.13 and 0.09–0.19 mag in the *g* and *r* bands, respectively, if the LBV was to completely disappear. These variations are broadly consistent with the light curve of Burke et al. (2020). This SDSS and DES ground-based photometry uses a large aperture of 5-arcsec diameter and a large fraction of the underlying galaxy flux is thus included in the aperture (see fig. 1 of Burke et al. 2020). The galactic component also captured within the aperture will have the effect of diluting the variation in the measured apparent magnitude if the LBV was to disappear.

Fig. 5 shows a high-spatial resolution image of PHL 293B obtained with *HST* (left-hand panel) compared to an SDSS image of lower spatial resolution (right-hand panel). Because of the high spatial resolution of the *HST* observations, we were able to extract photometry using a much smaller aperture than those of SDSS and DES. For that reason, the LBV contributes to a much higher fraction of the flux in the *HST* observations. Some of our best-fitting CMFGEN models are consistent with the magnitude and colours observed with *HST*, implying that the object for which we extracted 2010 *HST* photometry may actually be the LBV itself. Fainter LBV models are also consistent with the data. Because of the smaller aperture, if the LBV disappeared we predict much higher magnitude changes in future *HST* data, even for the faint models. We find lower limits for the  $\Delta m$  in each filter, obtaining  $\Delta m_{F336W} = 1.07$ ,  $\Delta m_{F438W} = 1.54$ ,  $\Delta m_{F606W} = 1.26$ , and  $\Delta m_{F814W} = 0.81$  mag. High-

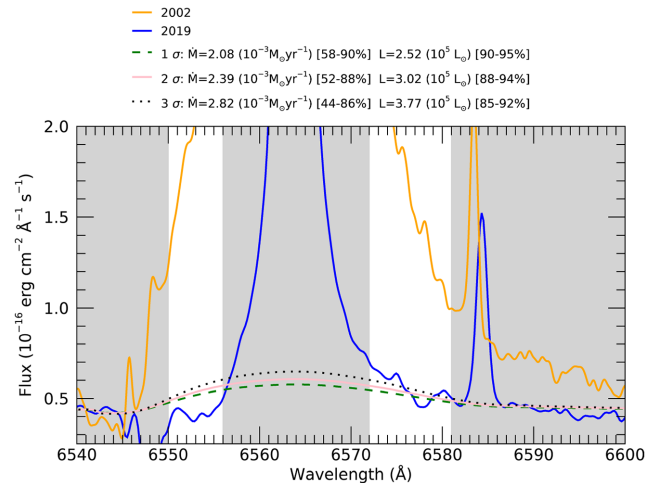

**Figure 6.** CMFGEN models compared to the 2019 X-shooter spectrum (blue). The models correspond to upper limits of  $L_{\text{surv}}$  and  $\dot{M}_{\text{surv}}$  with  $1\sigma$  (dashed green),  $2\sigma$  (solid pink), and  $3\sigma$  (dotted black) confidence. The 2002 UVES spectrum (yellow) is included to highlight the significant reduction in the broad  $H\alpha$  emission.

resolution spatial observations are therefore warranted to constrain the photometric variability of the LBV and potentially verify its complete disappearance.

We also investigate the maximum values of the luminosity ( $L_{\text{surv}}$ ) and mass-loss rate ( $\dot{M}_{\text{surv}}$ ) that a surviving star concealed within the noise of the 2019 X-shooter spectrum could have. Assuming no dust formation and no change in temperature, we find  $L_{\text{surv}} = 3.8 \times 10^5 L_{\odot}$  and  $\dot{M}_{\text{surv}} = 2.8 \times 10^{-3} M_{\odot} \text{ yr}^{-1}$  (Fig. 6). This would require minimum reductions in  $L_{\ast}$  and  $\dot{M}$  of 85–92 and 44–86 per cent, respectively. However, the underlying star could be much more luminous when taking circumstellar dust into account. With the end of the eruption, the star could have become hotter and with a lower mass-loss rate. In this case, the upper limit on  $L_{\text{surv}}$  would be higher than what we quote above.

### 3 THE FATE OF THE MASSIVE STAR IN PHL 293B

Based on our observations and models, we suggest that PHL 293B hosted an LBV with an eruption that ended sometime after 2011. This could have been followed by (1) a surviving star or (2) a collapse of the LBV to a BH without the production of a bright SN, but possibly with a weak transient.

One possibility is that we are seeing the end of an LBV eruption of a surviving star, with a mild drop in luminosity, a shift to higher effective temperatures, and some dust obscuration. The lack of variation of broad emission in the  $H\alpha$  and  $H\beta$  in all spectra from 2001 to 2011 would require such an eruption to have persisted for a minimum of 8.5 yr. Considering the high mass-loss rate and relatively low temperatures for the outer wind from our model predictions, the dust obscuration scenario does also not necessarily require a sudden end of the eruption between the 2011 and 2016 observations. A combination of a slightly reduced luminosity and a thick dusty shell could result in the star being obscured. While the lack of variability between the 2009 and 2019 near-infrared continuum from our X-shooter spectra eliminates the possibility of formation of hot dust ( $\gtrsim 1500$  K), mid-infrared observations are necessary to rule out a slowly expanding cooler dust shell.

Smith & Owocki (2006) show that optically thick, continuum-driven outbursts could play a greater role in the mass-loss of massive stars than steady, line-driven winds. Importantly, they suggest that such outbursts should be largely metallicity insensitive in comparison to line-driven winds. Our potential finding of such an outburst at a low metallicity could help confirm their hypothesis, implying that mass-loss at low metallicities could be dominated by continuum-driven winds/eruptions. This conclusion would carry important implications for the final masses and SNe produced by the first stars of the Universe.

There is considerable debate on the end stages and fate of the most massive stars. Instead of surviving the eruption, the LBV in PHL 293B could have instead collapsed to a BH, with perhaps the LBV eruption signalling the end of the stellar life. Assuming that a BH has been formed, we utilize low-initial-metallicity ( $Z = 0.002$  and  $0.0004$ ) stellar evolutionary models (Georgy et al. 2013; Groh et al. 2019b) to estimate the BH mass. We find that an initial mass between  $85$  and  $120 M_{\odot}$  best suits our determined parameters for the LBV. Based on these initial masses, a BH could have a mass between  $40$  and  $90 M_{\odot}$  through fallback, assuming no mass-loss at that stage. The final BH mass depends on the rotation of the progenitor. Fast-rotating models within this initial mass range may produce a pair-instability SN rather than a core collapse to a BH. The non-detection of such a bright event, however, suggests that this was likely not the case for the LBV in PHL 293B. Evolutionary models predict that the lifetime of a star with initial mass of  $120 M_{\odot}$  is between  $2.88$  and  $3.90$  Myr, depending on the metallicity and rotation (Georgy et al. 2013; Groh et al. 2019b). The initial mass of the star could, however, have been significantly lower if the star was a mass gainer in a binary system. This would result in a drastically longer lifetime and lower BH mass. Determining the age of the stellar population surrounding the LBV could possibly discriminate between single and binary star evolutionary scenarios; see Smith & Tombleson (2015).

A spectroscopic observation of a star immediately preceding the collapse to a BH without a bright SN would be unprecedented. LBVs span a wide range of luminosities (Smith et al. 2019) and it would not be impossible for a low-luminosity, dust-reddened LBV to show eruptive behaviour and perhaps collapse to a BH. This could

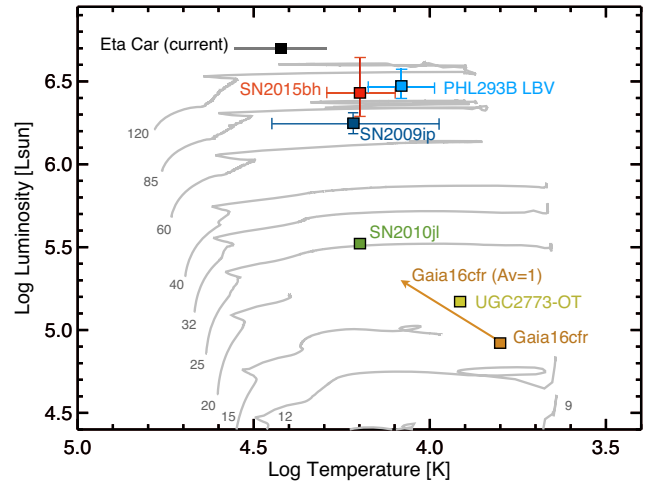

**Figure 7.** HR diagram showing the location of the LBV in PHL 293B during 2001–2011. We also include Eta Car (Groh et al. 2012) and the progenitors of SN 2015bh (Boian & Groh 2018), SN 2009ip (Smith et al. 2010; Foley et al. 2011), UGC2773-OT (Smith et al. 2010), SN 2010jl (Smith et al. 2011), and Gaia16cfr (Kilpatrick et al. 2018). We also show in grey the evolutionary tracks for rotating stars with initial masses in the range  $9$ – $120 M_{\odot}$  at  $Z = 0.0004$  (Groh et al. 2019b).

have important consequences for N6946-BH1, for which an RSG progenitor was originally suggested (Adams et al. 2017).

An alternative explanation for the disappearance for the LBV in PHL 293B is an undetected SN explosion. Burke et al. (2020) favour this hypothesis, suggesting that an SN II<sub>e</sub> event occurred between 1995 and 1998, during which no photometry is available. In this case, the broad components seen in the Balmer lines between 2001 and 2011 would come from interaction between the SN ejecta and a dense circumstellar medium. This scenario requires that a potentially prolonged SN interaction went undetected at early times, and our data cannot rule this out.

Both pre- and post-explosion spectra have been reported for only one SN (SN 1987a; Walborn et al. 1989) and two SN candidates (SN 2009ip, e.g. Smith et al. 2010; Smith, Mauerhan & Prieto 2014; and SN 2015bh, e.g. Thöne et al. 2017; Boian & Groh 2018). Analysis of the pre-explosion spectra has revealed that the progenitor of SN 2015bh was an LBV star (Boian & Groh 2018). Interestingly, the spectra and, consequently, the predicted parameters of its progenitor do not greatly differ from that of the LBV in PHL 293B.

Our best-fitting models for the 2002–2011 spectra place the LBV in PHL 293B at the higher  $L_*$  end of the HR diagram (Fig. 7), in proximity to very massive LBVs such as Eta Car, and in a  $T_*$  range characteristic of LBVs. It should be noted that the wind properties are stronger than those of Eta Car, with  $\dot{M}_*$  being 5–20 times larger for PHL 293B. It is, however, remarkably similar to the quiescent LBV progenitor of SN 2015bh, in  $L$ ,  $T$ ,  $\dot{M}_*$ , and  $v_{\infty}$ , with SN 2015bh being only slightly hotter (Fig. 7). SN 2015bh (Boian & Groh 2018) is an SN candidate with a rare pre-explosion spectrum. SN 2009ip is part of the same category of events, and its progenitor also resides in a similar region of the HR diagram, however, slightly dimmer than PHL 293B, and with relatively poor  $T_*$  constraints. Other LBV progenitors of luminous transients, such as SN 2010jl (Stoll et al. 2011) and Gaia16cfr (Kilpatrick et al. 2018), which have been identified in pre-explosion photometry, and show much lower luminosities but consistent temperatures.

An obvious difference between all mentioned transients and the PHL 293B case is the detection of an SN explosion rather than simply the fading of the star.

The case of PHL 293B is unique in the sense that several spectra were obtained shortly before its disappearance, which show spectral features that are consistent with stellar properties of an LBV in eruption. The low metallicity ( $\sim 0.1$  solar) of PHL 293B further amplifies its importance. Deep high-spatial-resolution imaging is needed to further discriminate between the different scenarios that have been proposed. It will be highly beneficial to search for similar events in large-scale surveys such as the Zwicky Transient Factory (ZTF; Bellm et al. 2019) and the Large Synoptic Survey Telescope (LSST; Ivezić et al. 2008). Given that the majority of such events in deep surveys will be much fainter than PHL 293B and located much farther, a detailed analysis of this object in the local Universe provides an important benchmark for understanding the late-time evolution of massive stars in low-metallicity environments and their remnants.

## ACKNOWLEDGEMENTS

We thank the anonymous referee for their constructive comments. AA acknowledges funding from the Provost's PhD Project Awards at Trinity College Dublin. JHG acknowledges support from the Irish Research Council New Foundations Award 206086.14414 'Physics of Supernovae and Star'. IB is supported by a Trinity College Dublin Postgraduate Award. EF acknowledges funding from the Irish Research Council Project 208026, Award 15330.

This paper is based on observations collected at the European Southern Observatory under programmes 70.B-0717, 60.A-9442, 60.A-9502, and 2104.D-5015.

This paper is based on observations made with the NASA/ESA *Hubble Space Telescope*, obtained from the Data Archive at the Space Telescope Science Institute, which is operated by the Association of Universities for Research in Astronomy, Inc., under NASA contract NAS5-26555. These observations are associated with program #12018.

Funding for SDSS-III has been provided by the Alfred P. Sloan Foundation, the Participating Institutions, the National Science Foundation, and the US Department of Energy Office of Science. The SDSS-III website is <http://www.sdss3.org/>.

SDSS-III is managed by the Astrophysical Research Consortium for the Participating Institutions of the SDSS-III Collaboration including the University of Arizona, the Brazilian Participation Group, Brookhaven National Laboratory, Carnegie Mellon University, University of Florida, the French Participation Group, the German Participation Group, Harvard University, the Instituto de Astrofísica de Canarias, the Michigan State/Notre Dame/JINA Participation Group, Johns Hopkins University, Lawrence Berkeley National Laboratory, Max Planck Institute for Astrophysics, Max Planck Institute for Extraterrestrial Physics, New Mexico State University, New York University, Ohio State University, Pennsylvania State University, University of Portsmouth, Princeton University, the Spanish Participation Group, University of Tokyo, University of Utah, Vanderbilt University, University of Virginia, University of Washington, and Yale University.

## REFERENCES

- Adams S. M., Kochanek C. S., Gerke J. R., Stanek K. Z., Dai X., 2017, *MNRAS*, 468, 4968
- Anderson L. S., 1989, *ApJ*, 339, 558
- Barba R. H., Niemela V. S., Baume G., Vazquez R. A., 1995, *ApJ*, 446, L23
- Bellm E. C. et al., 2019, *PASP*, 131, 018002
- Boian I., Groh J. H., 2018, *A&A*, 617, A115
- Brown T. M., Heap S. R., Hubeny I., Lanz T., Lindler D., 2002, *ApJ*, 579, L75
- Burke C. J. et al., 2020, *AJ*, 894, L5
- Crowther P. A., Hadfield L. J., 2006, *A&A*, 449, 711
- Dolphin A., 2016, Astrophysics Source Code Library, record ascl:1608.013
- Dolphin A. E., 2000, *PASP*, 112, 1383
- Drissen L., Crowther P. A., Smith L. J., Robert C., Roy J.-R., Hillier D. J., 2001, *ApJ*, 546, 484
- Eldridge J. J., Stanway E. R., Xiao L., McClelland L. A. S., Taylor G., Ng M., Greis S. M. L., Bray J. C., 2017, *Publ. Astron. Soc. Aust.*, 34, e058
- Foley R. J., Berger E., Fox O., Levesque E. M., Challis P. J., Ivans I. L., Rhoads J. E., Soderberg A. M., 2011, *ApJ*, 732, 32
- Gal-Yam A., Leonard D. C., 2009, *Nature*, 458, 865
- Georgy C. et al., 2013, *A&A*, 558, A103
- Groh J. H., Hillier D. J., Damini A., Whitelock P. A., Marang F., Rossi C., 2009, *ApJ*, 698, 1698
- Groh J. H., Hillier D. J., Madura T. I., Weigelt G., 2012, *MNRAS*, 423, 1623
- Groh J. H., Meynet G., Ekström S., 2013, *A&A*, 550, L7
- Groh J. H., Meynet G., Ekström S., Georgy C., 2014, *A&A*, 564, A30
- Groh J. H., Farrell E., Meynet G., Smith N., Murphy L., Allan A., 2019a, preprint ([arXiv:1912.00994](https://arxiv.org/abs/1912.00994))
- Groh J. H. et al., 2019b, *A&A*, 627, A24
- Hillier D. J. et al., 2006, *ApJ*, 642, 1098
- Hillier D. J., 1991, *A&A*, 247, 455
- Hillier D. J., Miller D. L., 1998, *ApJ*, 496, 407
- Hillier D. J., Davidson K., Ishibashi K., Gull T., 2001, *ApJ*, 553, 837
- Humphreys R. M., Davidson K., 1994, *PASP*, 106, 1025
- Hunter I. et al., 2007, *A&A*, 466, 277
- Ivezić Z. et al., 2008, *Serb. Astron. J.*, 176, 1
- Izotov Y. I., Thuan T. X., 2009, *ApJ*, 690, 1797
- Izotov Y. I., Foltz C. B., Green R. F., Guseva N. G., Thuan T. X., 1997, *ApJ*, 487, L37
- Izotov Y. I., Thuan T. X., Stasińska G., 2007, *ApJ*, 662, 15
- Izotov Y. I., Guseva N. G., Fricke K. J., Henkel C., 2011, *A&A*, 533, A25
- Kilpatrick C. D. et al., 2018, *MNRAS*, 473, 4805
- Kotak R., Vink J. S., 2006, *A&A*, 460, L5
- Legrand F., Kunth D., Roy J. R., Mas-Hesse J. M., Walsh J. R., 1997, *A&A*, 326, L17
- Maeder A., Meynet G., 2000, *ARA&A*, 38, 143
- Massey P., Olsen K. A. G., Parker J. W., 2003, *PASP*, 115, 1265
- Massey P., Neugent K. F., Morrell N., Hillier D. J., 2014, *ApJ*, 788, 83
- Mould J. R. et al., 2000, *ApJ*, 529, 786
- Neugent K. F., Massey P., Morrell N., 2018, *ApJ*, 863, 181
- Schulze S. et al., 2015, *ApJ*, 808, 73
- Shenar T., Gilkis A., Vink J. S., Sana H., Sand er A. A. C., 2020, *A&A*, 634, A79
- Smith N. et al., 2010, *AJ*, 139, 1451
- Smith N. et al., 2011, *ApJ*, 732, 63
- Smith N., 2014, *ARA&A*, 52, 487
- Smith N., Owocki S. P., 2006, *ApJ*, 645, L45
- Smith N., Tombleson R., 2015, *MNRAS*, 447, 598
- Smith N., Hinkle K. H., Ryde N., 2009, *AJ*, 137, 3558
- Smith N., Mauerhan J. C., Prieto J. L., 2014, *MNRAS*, 438, 1191
- Smith N., Aghakhanloo M., Murphy J. W., Drout M. R., Stassun K. G., Groh J. H., 2019, *MNRAS*, 488, 1760
- Stoll R., Prieto J. L., Stanek K. Z., Pogge R. W., Szczygieł D. M., Pojmański G., Antognini J., Yan H., 2011, *ApJ*, 730, 34
- Terlevich R., Terlevich E., Bosch G., Díaz Á., Hägele G., Cardaci M., Firpo V., 2014, *MNRAS*, 445, 1449
- Thöne C. C. et al., 2017, *A&A*, 599, A129
- van Genderen A. M., 2001, *A&A*, 366, 508
- Walborn N. R., Prevot M. L., Prevot L., Wamsteker W., Gonzalez R., Gilmozzi R., Fitzpatrick E. L., 1989, *A&A*, 219, 229
